# Supplementary material for: Bilayered membranes of Janus dendrimers with hybrid hydrogenated and fluorinated dendrons: microstructures and coassembly with lipids
Source: Royal Society of Chemistry journal article supplement (doi:10.1039/c9cp01635j), 2019-01-01
Supplement: c9cp01635j1.pdf [file c9cp01635j1.pdf]

## Supporting information

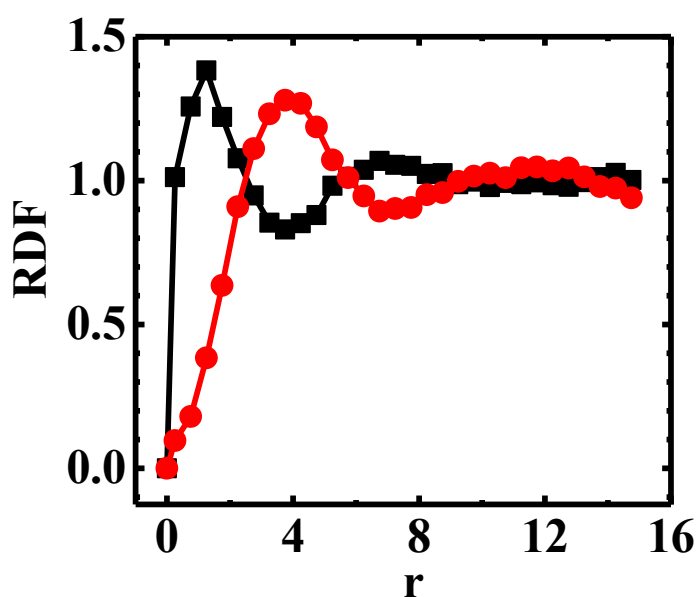

Figure S1. 2-dimensional radial distribution functions between lipid and  $R_B$  (black square) and  $R_F$  (red circle) dendrons.

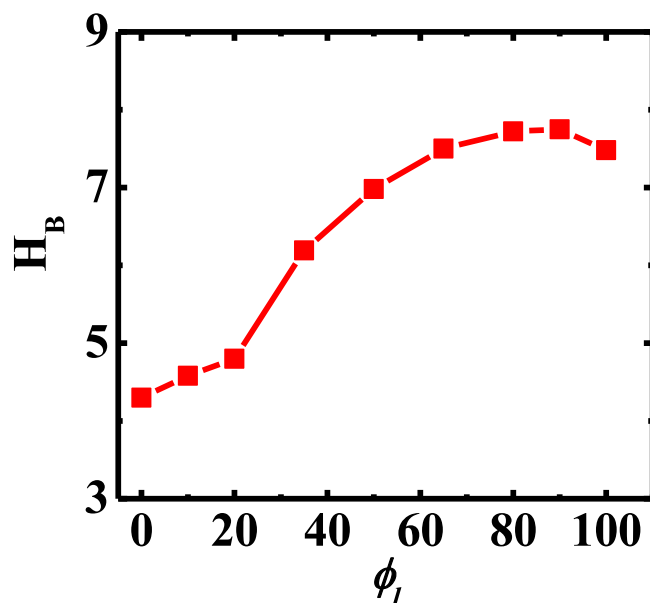

Figure S2. The variation of the thickness of the hydrophobic layer ( $H_B$ ) with the lipid concentration  $\phi_l$ . The thickness change is closely related to the decrease of the extent of interdigitation of dendrimers  $(\Delta h)_B$  with increasing  $\phi_l$  (see Figure 7(a)).
